# Supplementary material for: Real-World Outcomes of Crizotinib in ROS1-Rearranged Advanced Non-Small-Cell Lung Cancer
Source: MDPI journal article supplement (doi:10.3390/cancers16030528), 2024-01-26

## Supplementary Information

**Table S1.** Treatment pattern of crizotinib

| Characteristics                         | Total (n = 40) |
|-----------------------------------------|----------------|
| <b>Patients with dose adjustments</b>   | 15 (37.5)      |
| Adverse events                          | 14 (35.0)      |
| Investigator decision                   | 1 (2.5)        |
| <b>Last adjusted dose of crizotinib</b> |                |
| 250 mg twice daily                      | 4 (10.0)       |
| 250 mg once daily                       | 1 (2.5)        |
| 200 mg twice daily                      | 5 (12.5)       |
| 200 mg once daily                       | 1 (2.5)        |
| 100 mg twice daily                      | 1 (2.5)        |
| Final discontinuation                   | 3 (7.5)        |
| <b>Discontinued treatment</b>           | 21 (50.0)      |
| Disease progression <sup>a</sup>        | 14 (35.0)      |
| Adverse event <sup>a</sup>              | 3 (7.5)        |
| Withdrawal of consent                   | 1 (2.5)        |
| Patient refusal                         | 1 (2.5)        |
| Death                                   | 2 (5.0)        |
| <b>Ongoing treatment at data cutoff</b> | 19 (47.5)      |

<sup>a</sup>One patient had both toxicity and disease progression, leading to the final discontinuation of crizotinib.

**Table S2.** Cell-free DNA results of patients with ROS1-rearranged NSCLC

| Characteristics                                      | No. (%)  |
|------------------------------------------------------|----------|
| <b>At the time of crizotinib initiation (n = 14)</b> |          |
| CD74-ROS1 fusion                                     | 2 (14.3) |
| <b>At the time of disease progression (n = 8)</b>    |          |
| ROS1 p.(G2032R) c.6094G>A                            | 1 (12.5) |
| ROS1 p.(D2033N) c.6097G>A                            | 1 (12.5) |
| EML4-ALK fusion                                      | 1 (12.5) |
| KRAS p.(G12D) c.35G>A                                | 1 (12.5) |
| KIF5B-RET fusion                                     | 1 (12.5) |

**Figure S1.** Kaplan–Meier curves of progression-free survival in patients with and without brain metastasis.

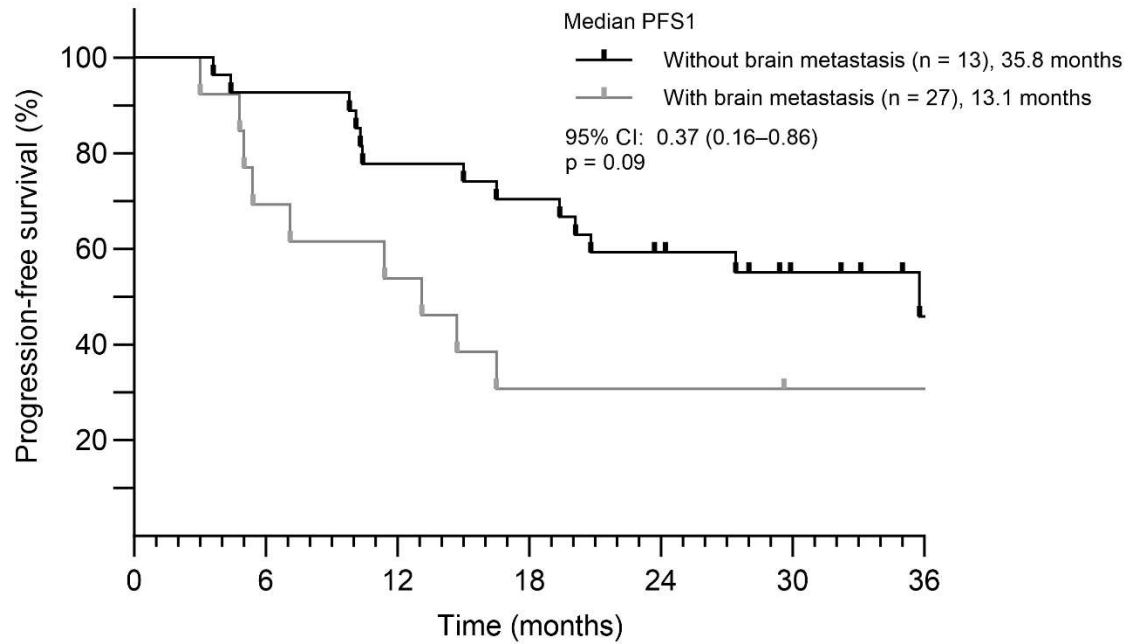

Supplement: s1 [file s1]
